# Supplementary material for: Multivalency of NDC80 in the outer kinetochore is essential to track shortening microtubules and generate forces
Source: eLife. 2018 Apr 9;7:e36764. doi: 10.7554/eLife.36764 (PMC5940359; doi:10.7554/eLife.36764)
Supplement: Figure 3—source data 1. — Accompanying Figure 3I. [file elife-36764-fig3-data1.xlsx]

## Sheet: Sheet1
	biotin, %	T3S1-FAM	T2S2-TMR	T1S3-TMR	T1S3-FAM
	0.00			0 / 10	0 / 20
	0.01	0 / 20	0 / 10	1 / 10	1 / 30
	0.03	0 / 10	0 / 10	2 / 20	1 / 10
	0.07	1 / 10	0 / 20	3 / 10	4 / 15
	0.10	2 / 20	3 / 10	2 / 10	4 / 10
